# Supplementary material for: A DERL3-associated defect in the degradation of SLC2A1 mediates the Warburg effect
Source: PubMed Central journal article supplement (PMC3988805; doi:10.1038/ncomms4608), 2014-04-03
Supplement: ncomms4608-s1.pdf [file ncomms4608-s1.pdf]

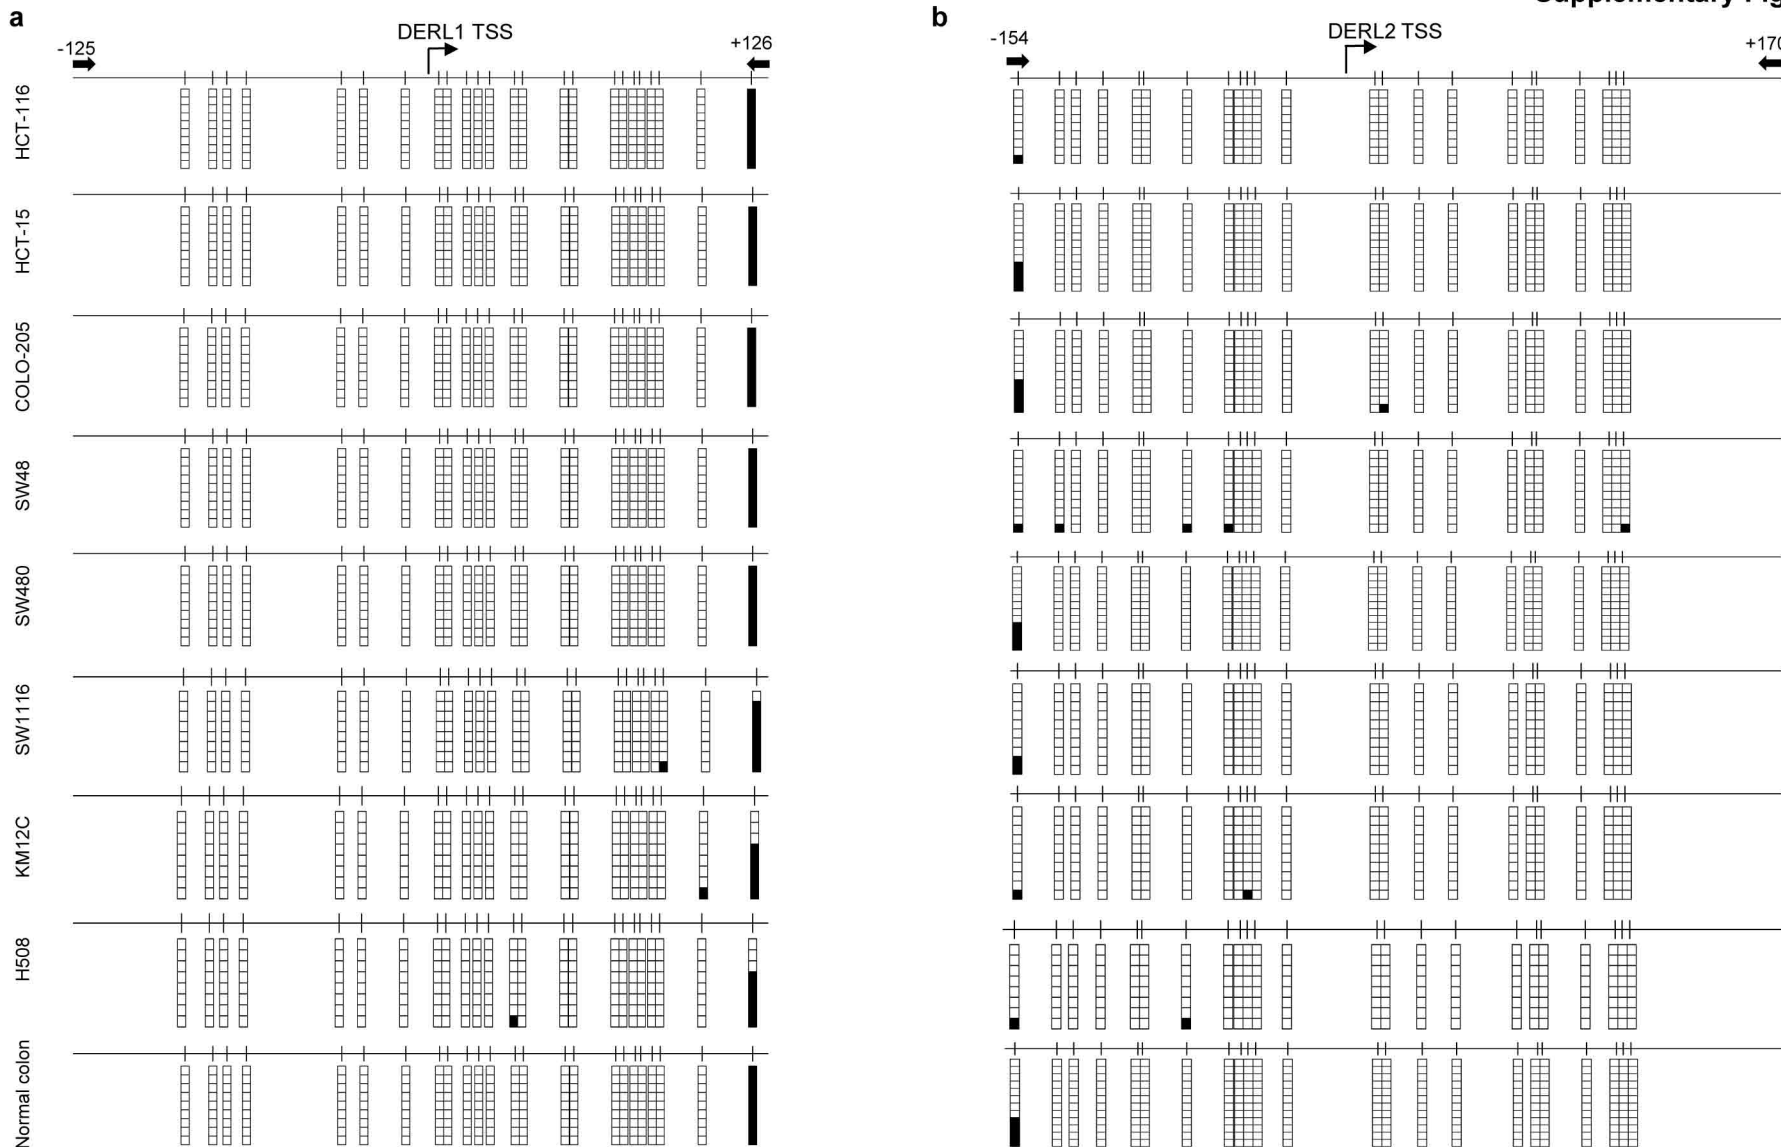

**Supplementary Figure 1. *DERL1* and *DERL2* do not show DNA methylation on their gene promoter in colorectal cancer cell lines.** *DERL1* (a) and *DERL2* (b) show an unmethylated CpG island in colorectal cancer cell lines. The vertical arrows represent the transcription start site (TSS) and the horizontal black arrows show the position of the bisulfite sequencing primers. White squares, unmethylated CpGs; black squares, methylated CpGs.



Supplementary Figure 3

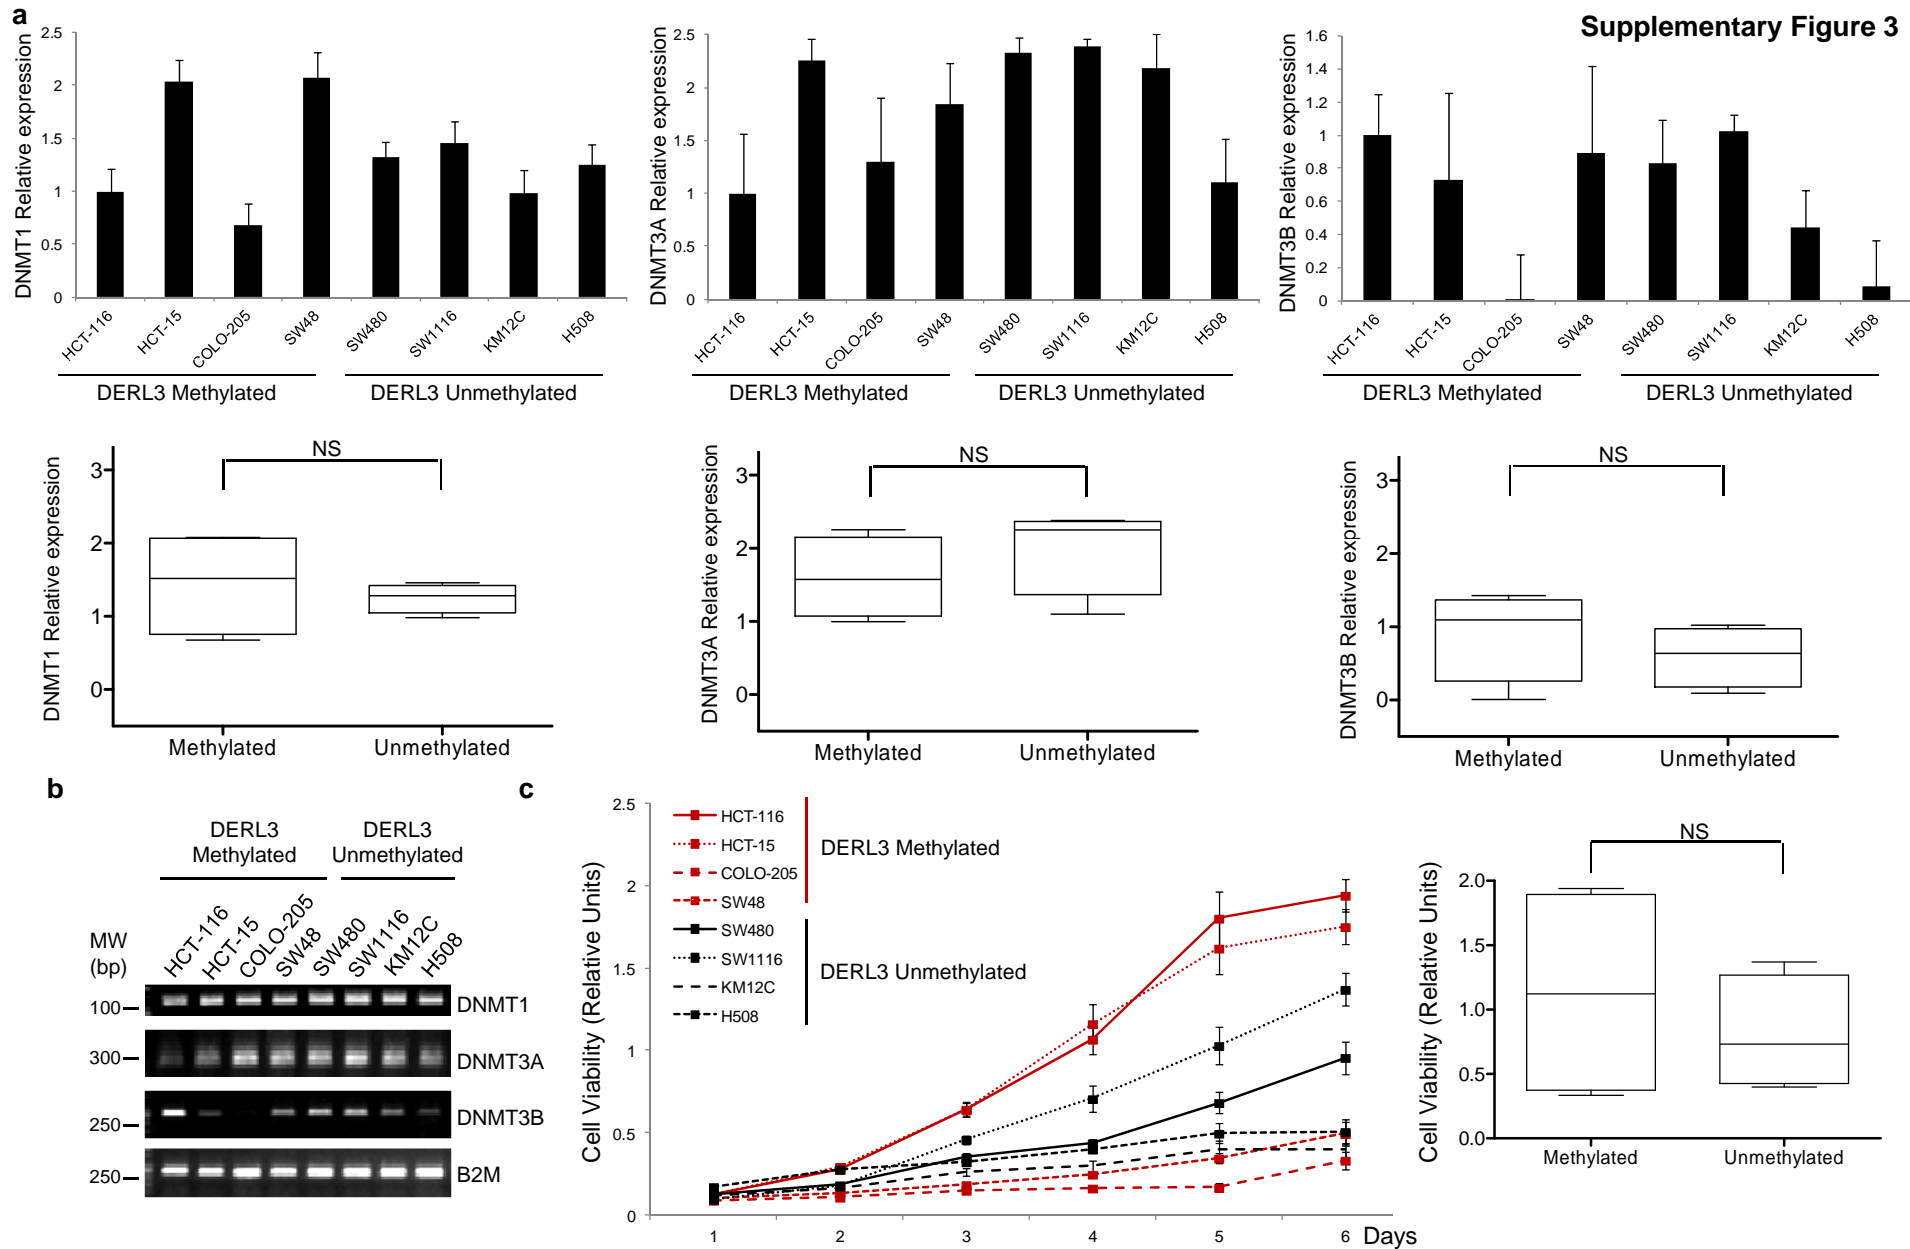

**Supplementary Figure 3.** (a) Top, DNA methyltransferases (*DNMT1*, *DNMT3A*, *DNMT3B*) gene expression in our panel of colorectal cancer cell lines analyzed by quantitative RT-PCR (data shown represent mean  $\pm$  SEM of biological triplicates); below, box plots of mean showing that there are no significant differences between the *DERL3* methylated and unmethylated groups (Mann-Whitney test). (b) semiquantitative PCR. *B2M*: beta-2-microglobulin. (c) MTT Cell viability assay in the panel of colorectal cancer cell lines. *DERL3* methylated cell lines (red); *DERL3* unmethylated cell lines (black). The box plots of mean show that there are no significant differences between *DERL3* methylated and unmethylated groups (Mann-Whitney test). NS: Non significant ( $p$ -value > 0.05).

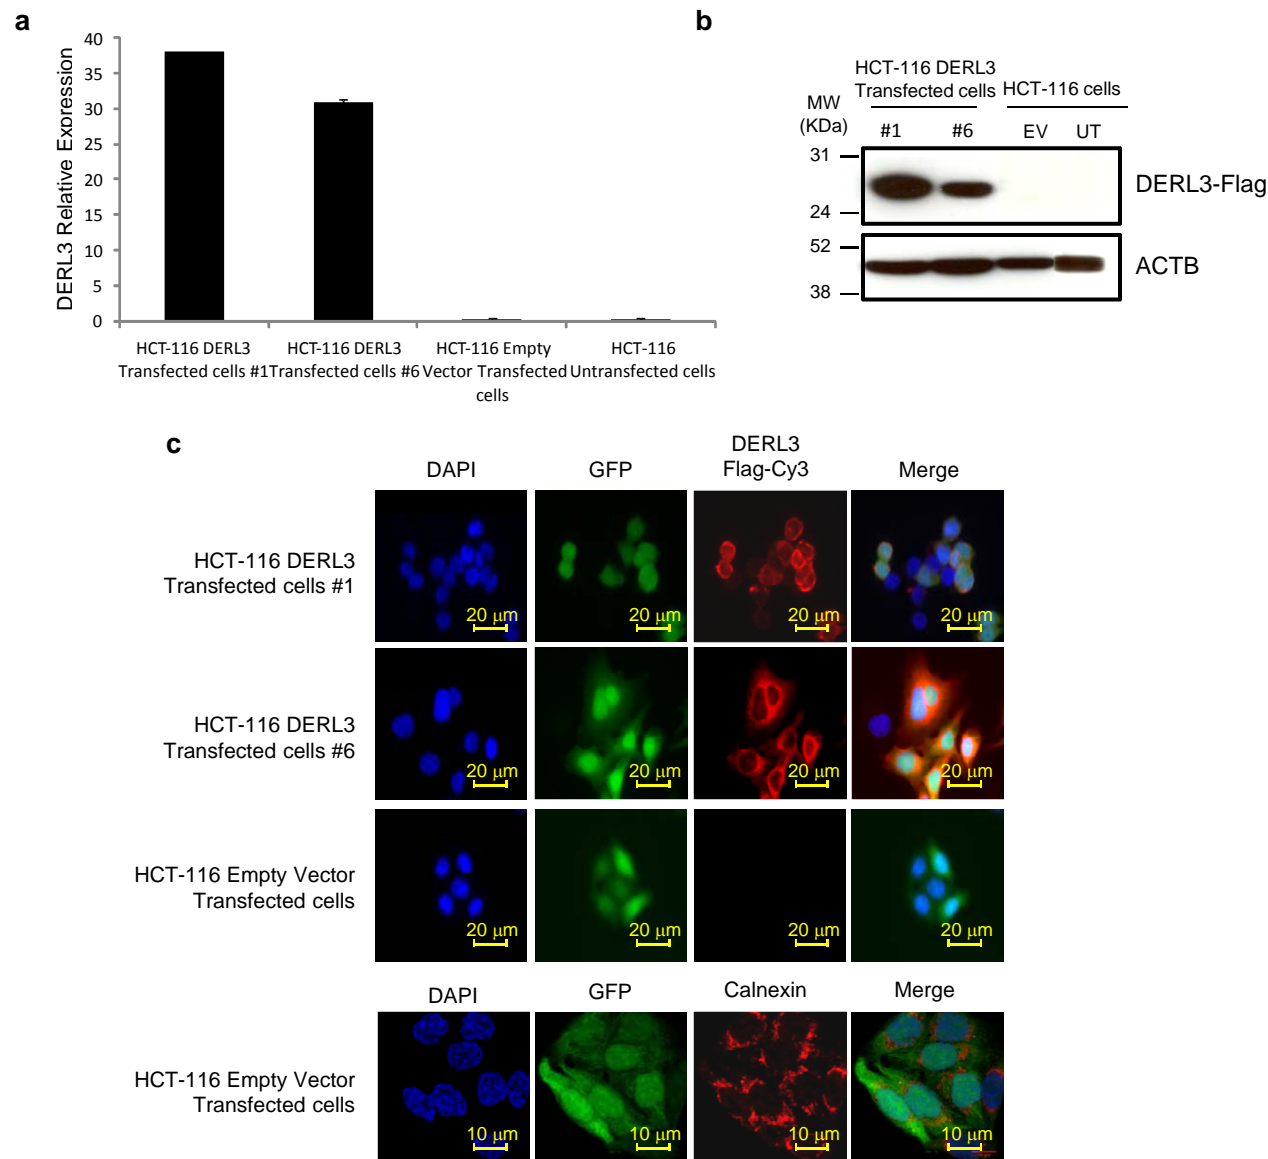

**Supplementary Figure 4. DERL3 expression recovery in HCT-116 cells.** (a) Full-length cDNA sequence of *DERL3* was cloned in pIRES2-eGFP plasmid for stable transfection in HCT-116 cells. Quantitative RT-PCR of two transfected clones (#1 and #6) shows the recovery of *DERL3* expression relative to HCT-116 empty vector transfected (EV) and untransfected (UT) cells. Data shown represent mean  $\pm$  SEM (biological triplicates). (b) Western blot of DERL3-Flag demonstrates the efficient transfection at the protein level. EV: Empty vector; UT: Untransfected (c) Immunocytofluorescence studies of DERL3 and empty vector-transfected HCT-116 cells. Classic staining of the endoplasmic reticulum is showed by the Flag-Cy3 antibody, reflecting the correct location of DERL3 fused protein in the transfected cells. Calnexin hybridization was used as a positive control for endoplasmic reticulum staining.

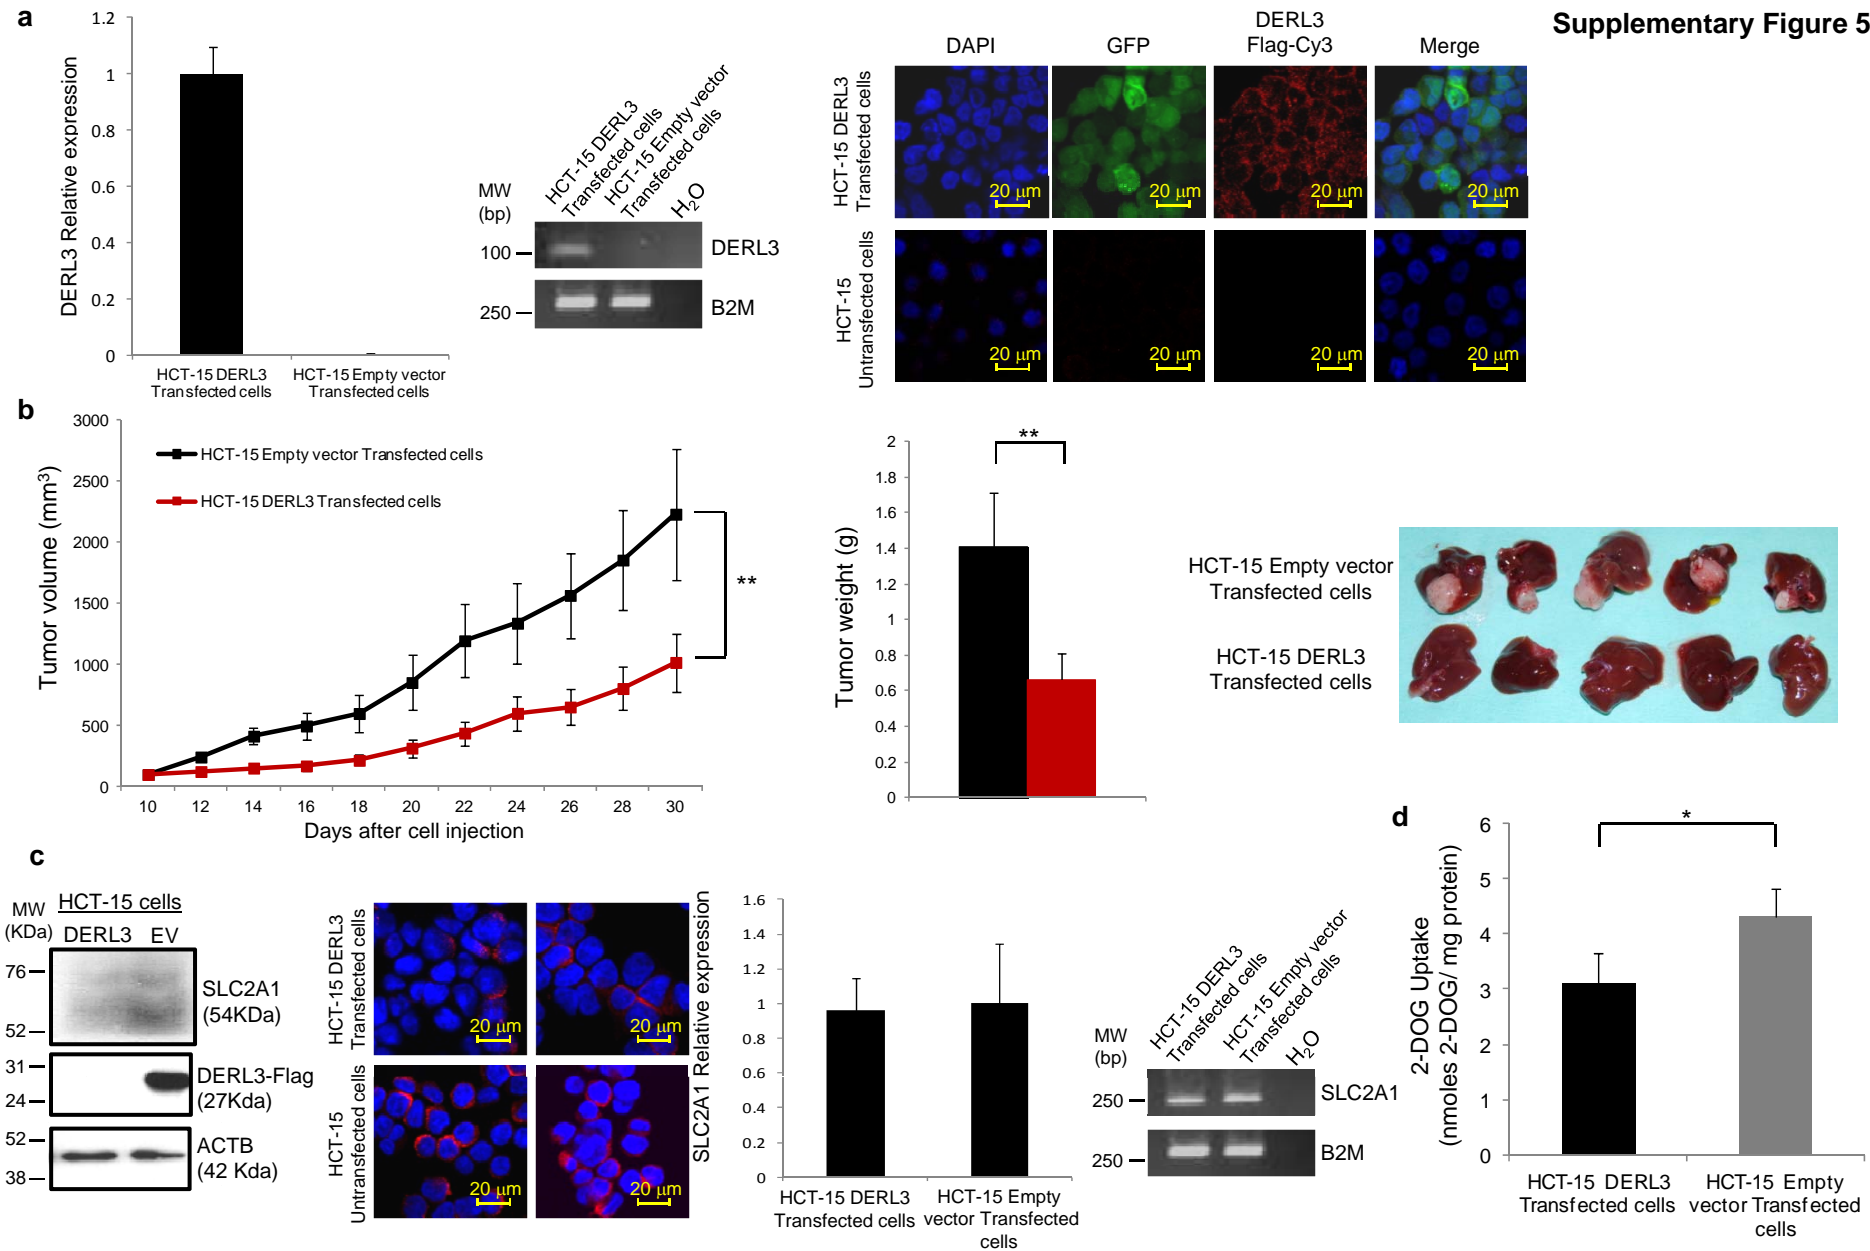

**Supplementary Figure 5. Functional consequences of DERL3 recovery in HCT-15 cells.** (a) Efficient restoration of *DERL3* in HCT-15 cells was confirmed by quantitative RT-PCR (data shown represent mean  $\pm$  SEM of biological triplicates), semiquantitative PCR and immunofluorescence. (b) Subcutaneous tumors generated in nude mice showed a reduction in tumorigenic capability of HCT-15 DERL3 transfected cells (data shown represent mean  $\pm$  SD) (Student's t-test,  $p$ -val<0.01), as well as a reduction in liver metastasis when the cells are injected directly in the spleen. (c) HCT-15 DERL3 transfected cells show reduced SLC2A1 protein levels as shown by western blot and immunofluorescence but not at messenger level, as shown by quantitative RT-PCR (data shown represent mean  $\pm$  SEM of biological triplicates), and semiquantitative PCR. EV= Empty vector. (d) HCT-15 DERL3 transfected cells show a reduction in 2-DOG uptake (data shown represent mean  $\pm$  SD) (Student's t-test,  $p$ -val<0.05).

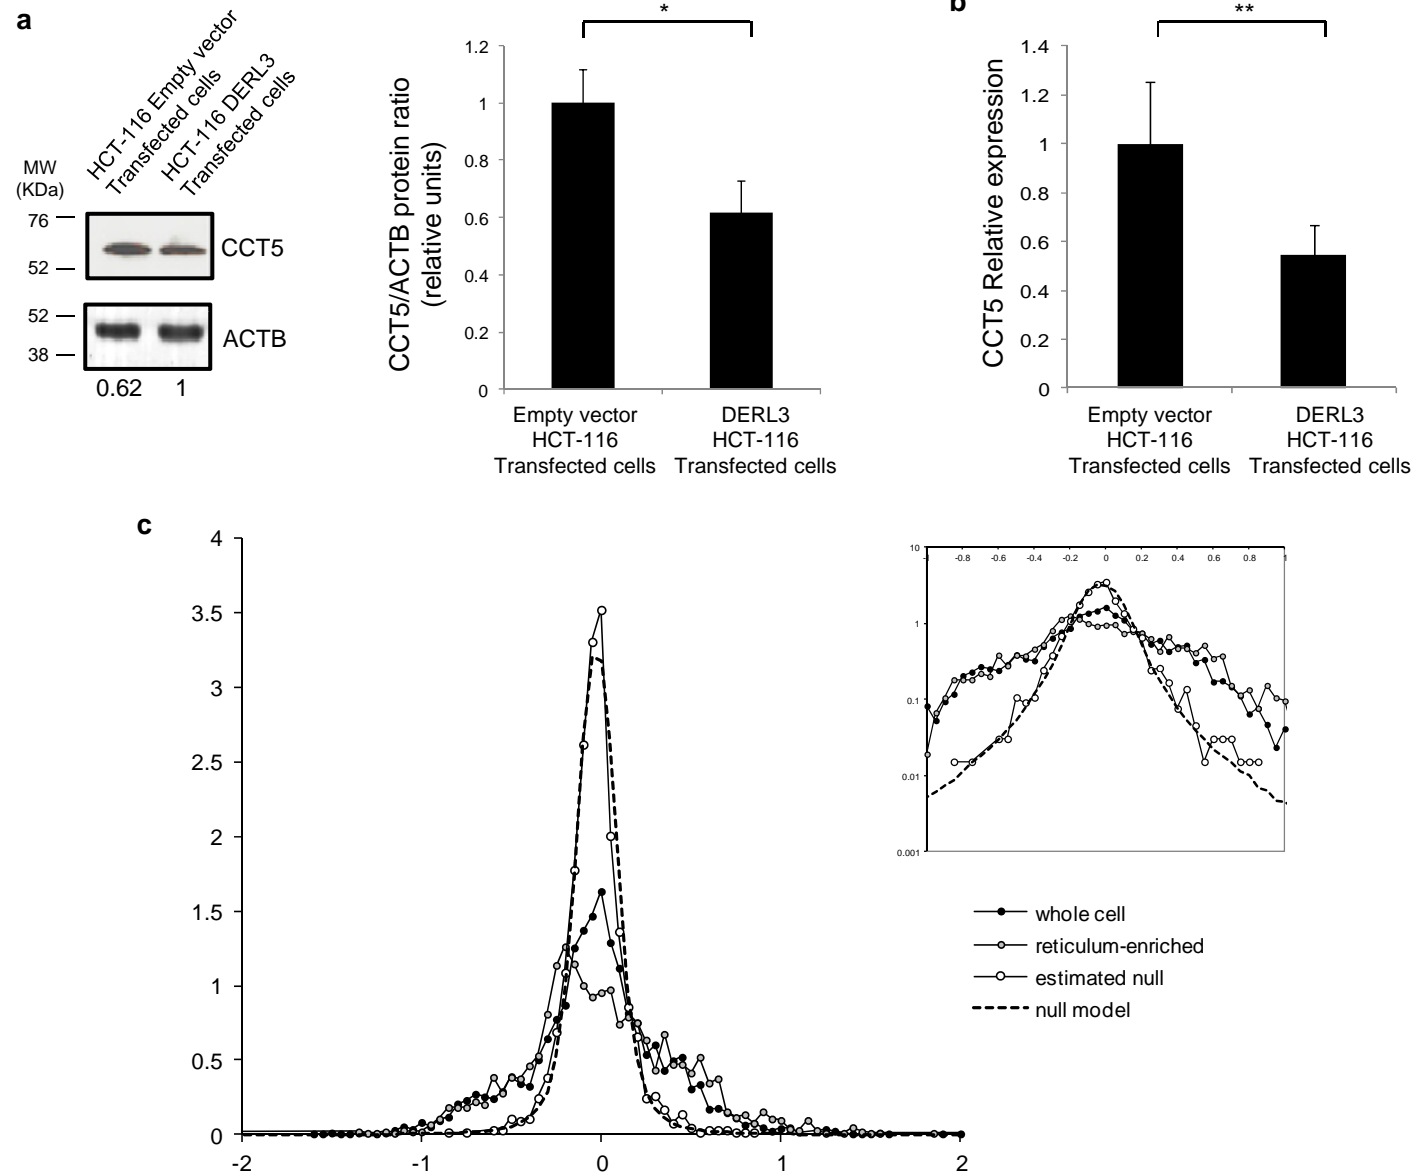

**Supplementary Figure 6.** (a) CCT5 protein is diminished in HCT-116 DERL3 transfected cells at the protein level as shown by the western blot (left panel). The right panel represents the quantification of the western blot bands (data shown represent mean  $\pm$  SD) (Student's t-test,  $p$ -val < 0.05). (b) CCT5 downregulation is also observed at the RNA level, as shown by the quantitative RT-PCR (data shown represent mean  $\pm$  SEM, biological triplicates) (Student's t-test,  $p$ -val < 0.01). (c) log<sub>2</sub> (fold-change) dispersion patterns of peptide signals in whole-cell lysate, reticulum-enriched fraction and non-differentially expressed proteins of both experiments, in decimal an logarithmic (upper right panel) scale.

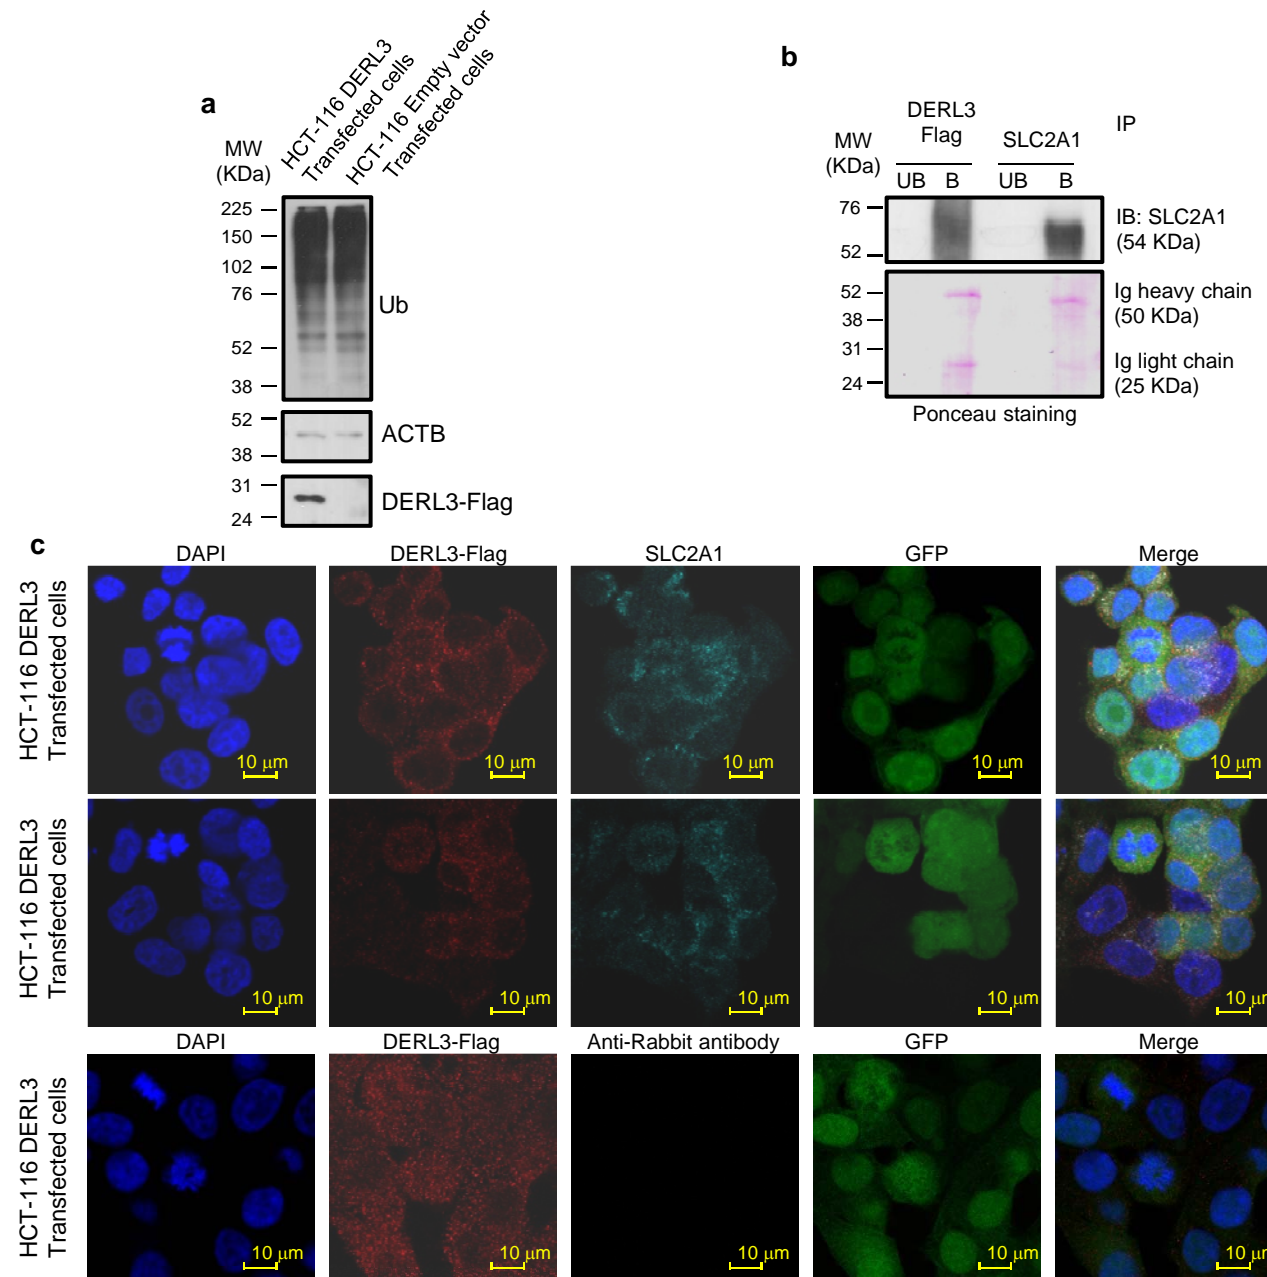

**Supplementary Figure 7** (a) Western blot shows the absence of differences in global ubiquitin levels between DERL3-FLAG and pIRES2-eGFP HCT-116-transfected cells. (b) HCT-116 DERL3 Transfected cells were subjected to immunoprecipitation assay with anti-Flag antibody and anti SLC2A1 antibody; the western blot shows the interaction between DERL3 and SLC2A1 when DERL3 is pulled down (cropped image). The same conditions were used in both IPs, as shown by Ponceau staining. IP: immunoprecipitation; IB: immunoblotting; UB: unbound fraction; B: bound fraction. (c) DERL3 and SLC2A1 colocalize in the membrane of the endoplasmic reticulum (Mander's overlap colocalization coefficient of 0.478).

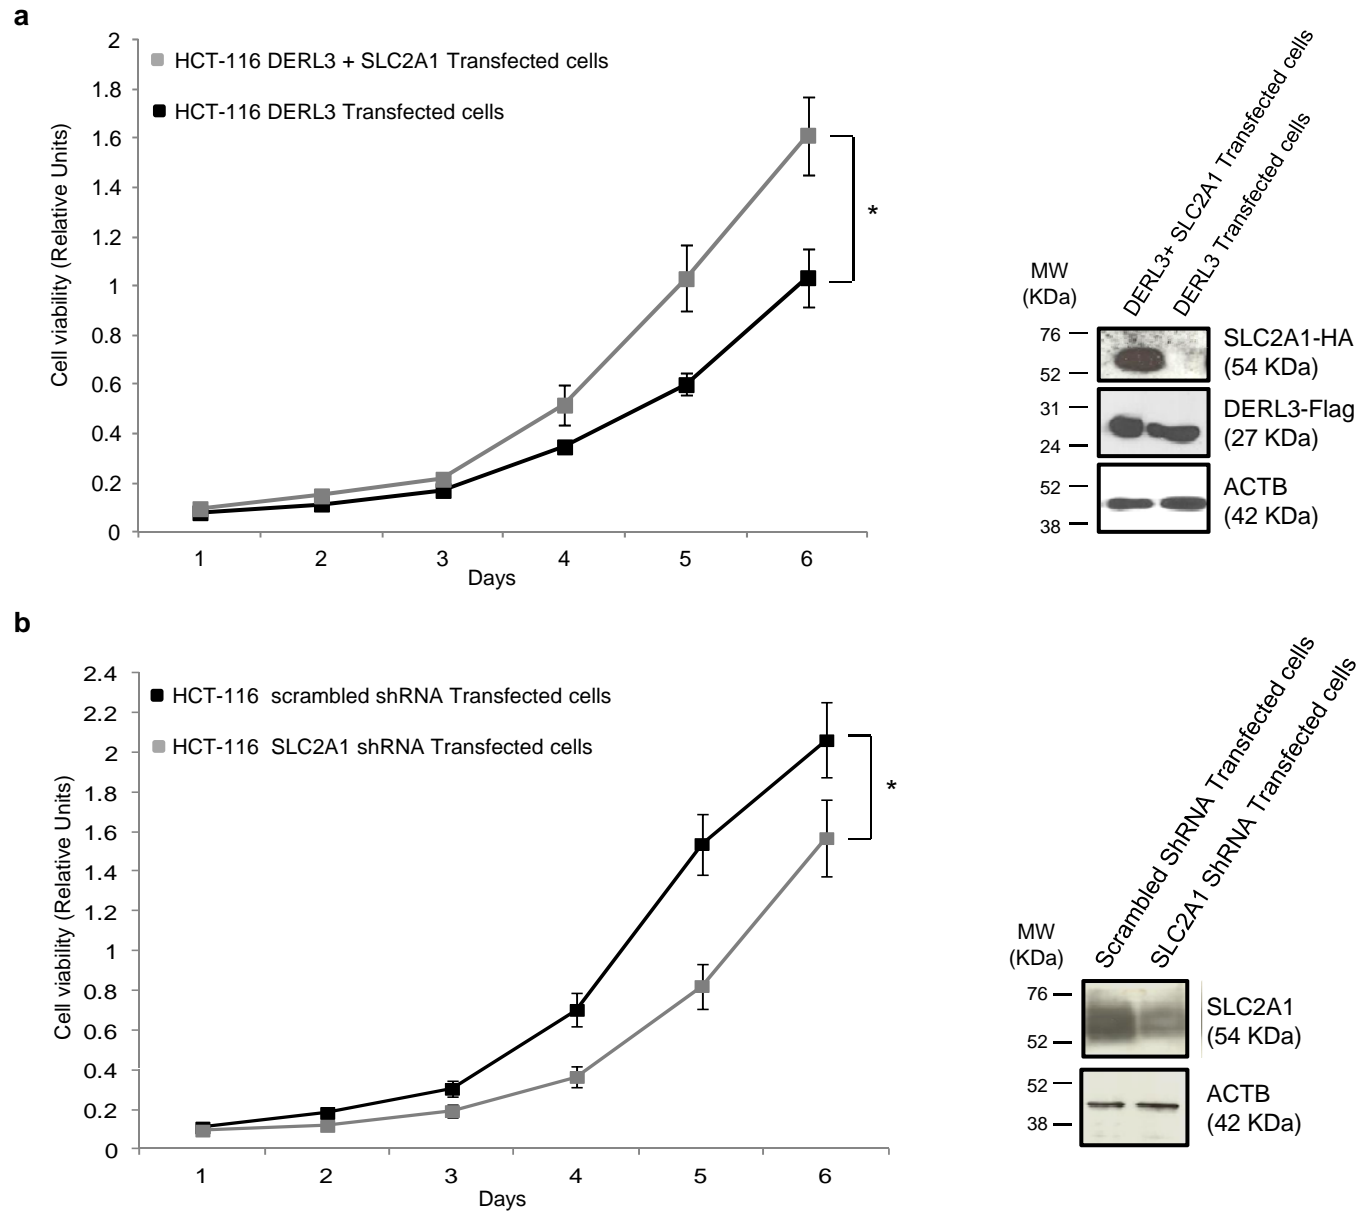

**Supplementary Figure 8.** (a) SLC2A1 recovery in HCT-116 DERL3 Transfected cells mitigates the effect of DERL3 overexpression in cell viability (data shown represent mean  $\pm$  SD) (Student's t-test,  $p$ -val<0.05). The right panel shows recovery of SLC2A1, HA tagged, by western blot. (b) SLC2A1 silencing by shRNA diminish the cell viability in HCT-116 (data shown represent mean  $\pm$  SD) (Student's t-test,  $p$ -val<0.05), the right panel show the downregulation of SLC2A1 upon shRNA transfection.



a

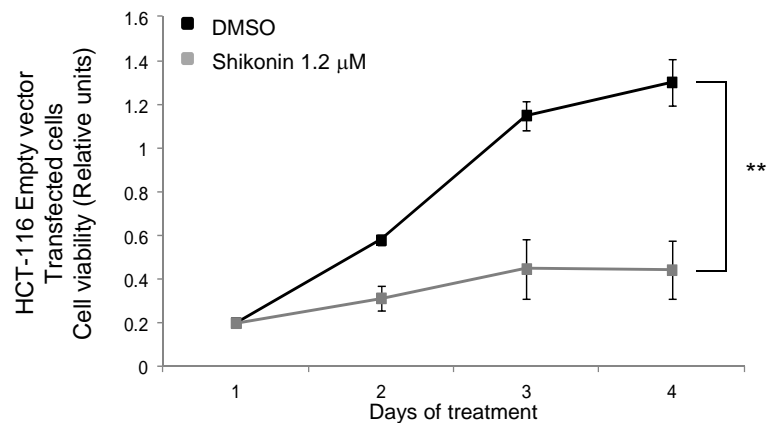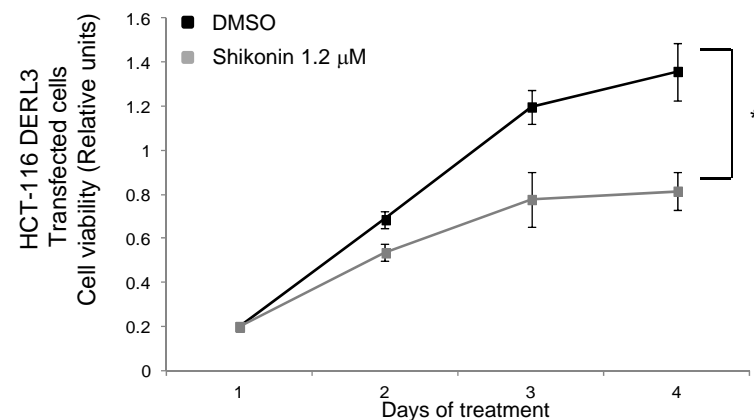

b

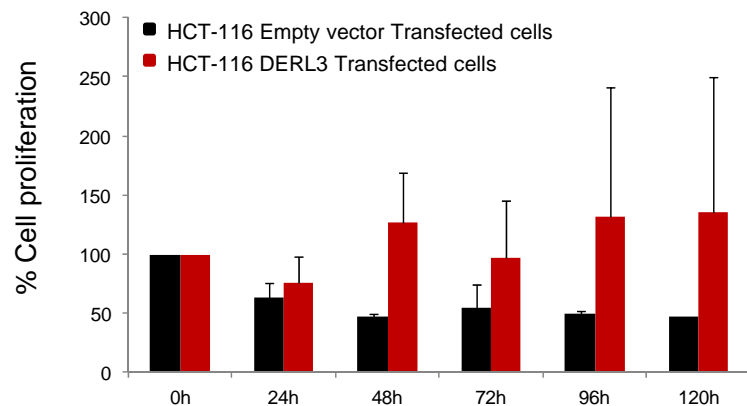

c

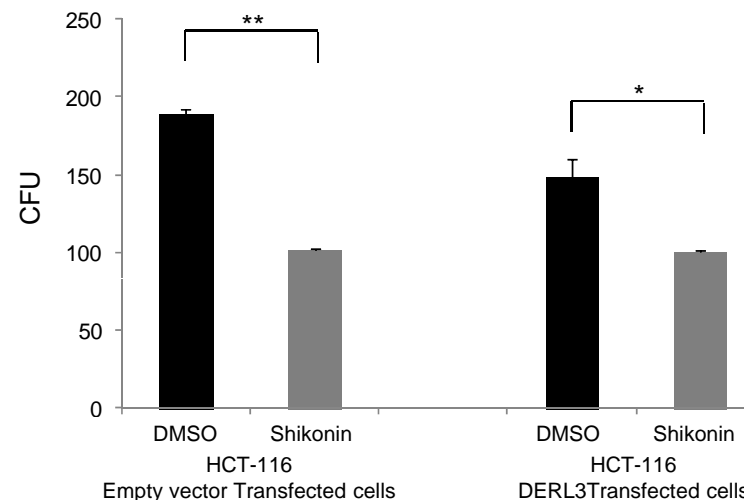

**Supplementary Figure 9. HCT-116 cells show a higher sensibility to shikonin when compared to HCT-116 DERL3 transfected cells.** (a) HCT-116 Empty vector cells showed a higher sensibility to shikonin treatment in a time-course experiment (data shown represent mean  $\pm$  SD) (Student's t-test, \*\*p-val<0.01, \* p-val<0.05). SRB Cell proliferation assay (b) and colony formation assay (c) under shikonin treatment confirm the previous results (data shown represent mean  $\pm$  SD) (Student's t-test, \*\* pval<0.01, \* p-val<0.05). CFU: Colony Formation Units.

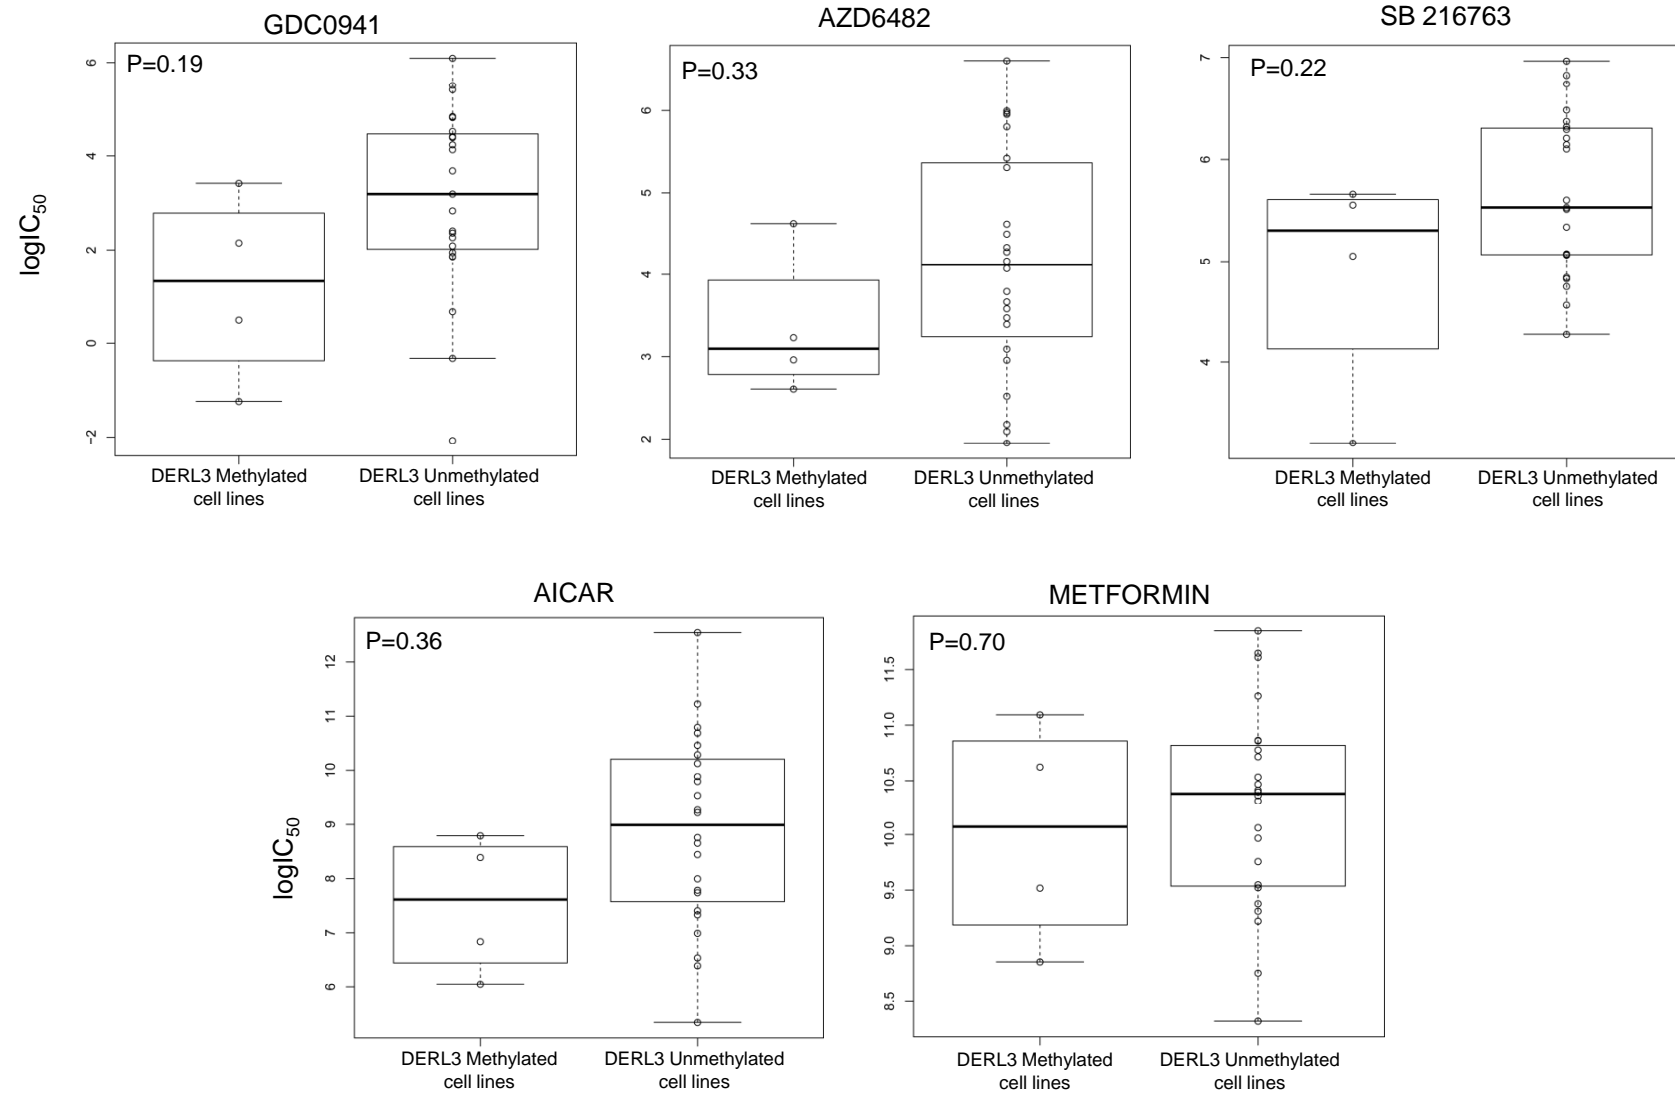

**Supplementary Figure 10. DNA methylation levels of the *DERL3* promoter are associated to sensitivity to metabolic inhibitors.** *DERL3* hypermethylated (n=4) and hypomethylated (n=22) colorectal cell lines displays differences in drug  $IC_{50}$  values (MANOVA test, corrected for multiple testing hypothesis) assessed by viability assays.

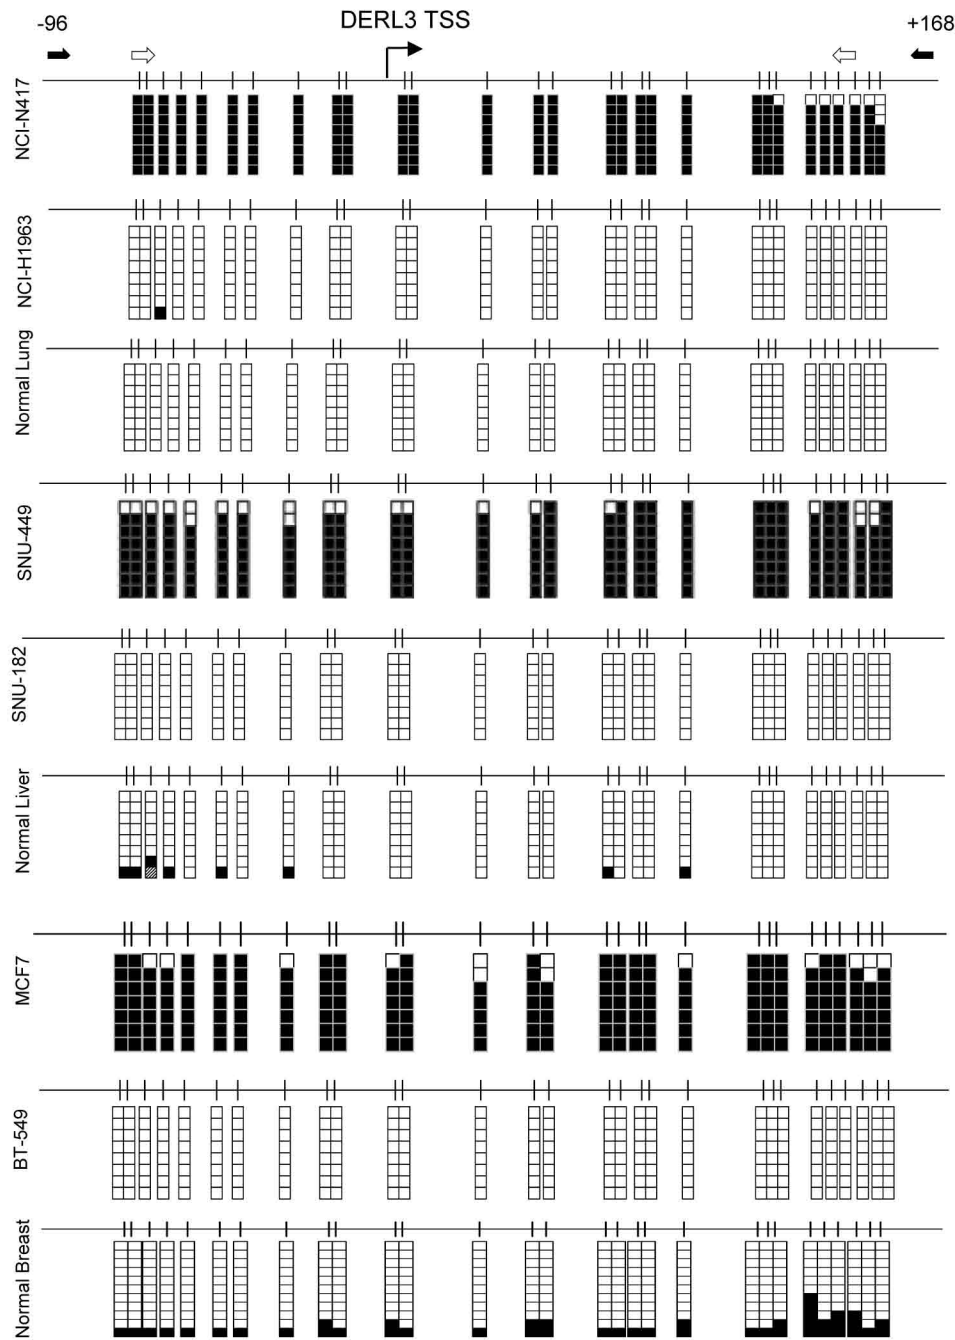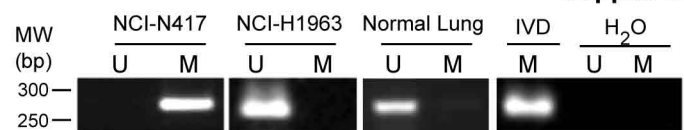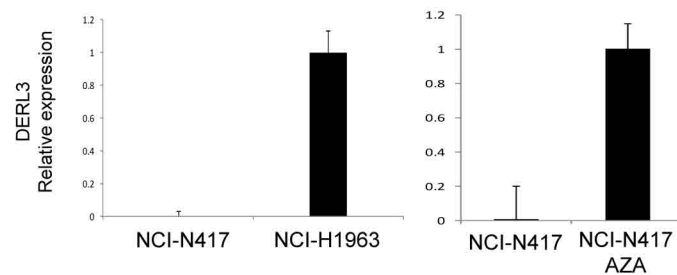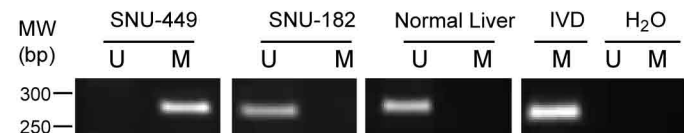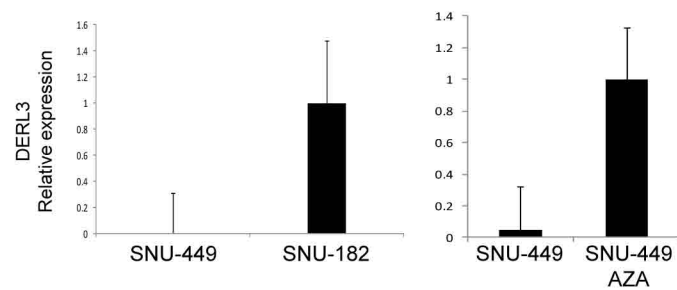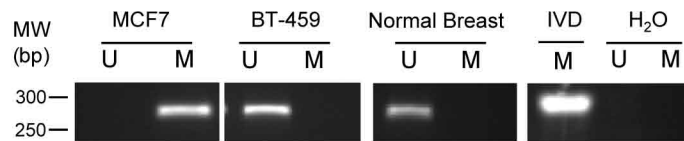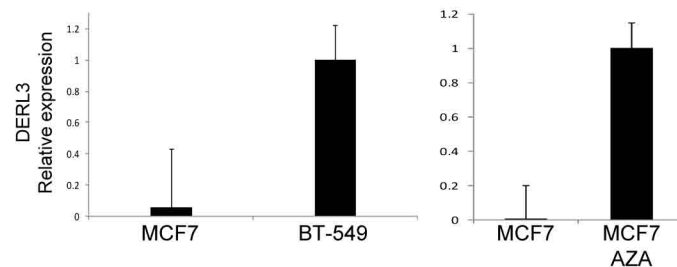

**Supplementary Figure 11. *DERL3* promoter hypermethylation and associated gene silencing in lung, liver and breast cancer cell lines.** Data shown represent mean  $\pm$  SEM (biological triplicates).

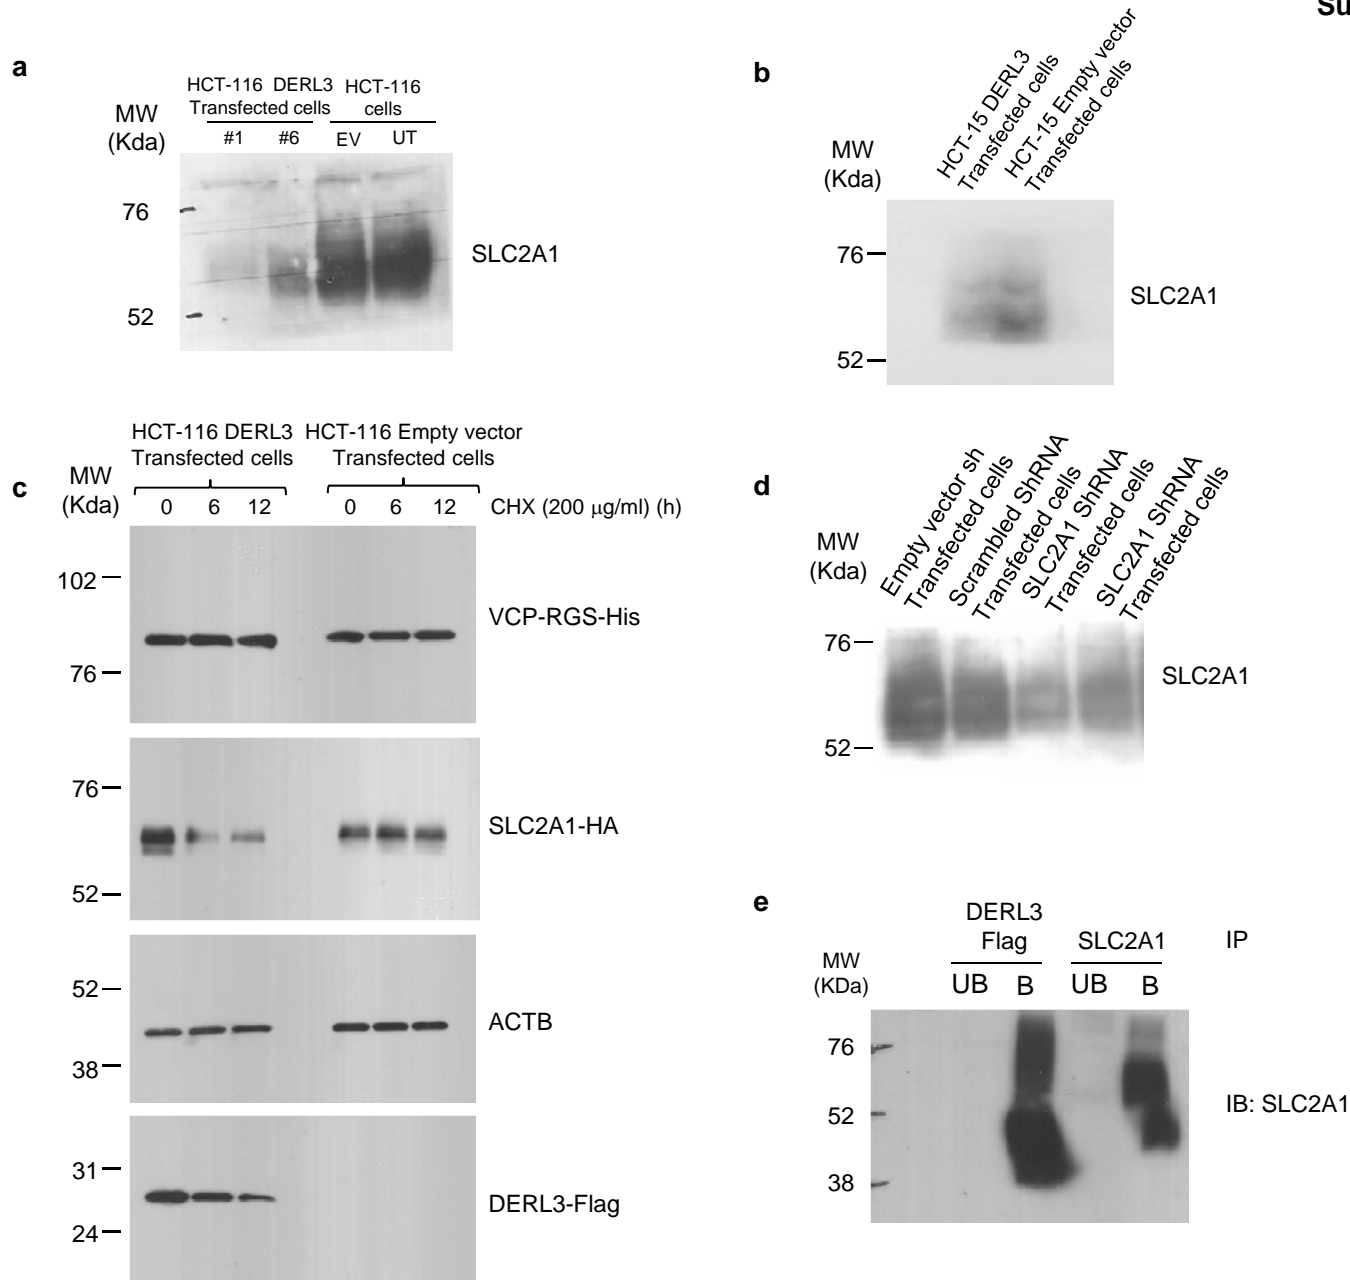

**Supplementary Figure 12.** Uncropped membranes of western blots. SLC2A1 downregulation upon DERL3 transfection in HCT-116 (a) and HCT-15 cells (b). (c) Cycloheximide chase assay showing SLC2A1 degradation in the presence of DERL3. (d) SLC2A1 downregulation upon shRNA transfection. (e) immunoprecipitation assay with anti-Flag antibody and anti SLC2A1 antibody for immunoblotting.

**Supplementary Table 1.** List of thirty-three proteins represented for at least two peptides that underwent significant downregulation in the SILAC analyses upon *DERL3* transfection in HCT-116 cells.

| contrast     | p-value     | FDR         | ID Gene              |
|--------------|-------------|-------------|----------------------|
| -4.260761473 | 1.00E-05    | 0.000296906 | SLC2A1               |
| -1.471969136 | 3.00E-05    | 0.000544328 | NQO1                 |
| -1.231432828 | 0.000489995 | 0.004495292 | ALDH1A3              |
| -1.095319801 | 0.000649994 | 0.005586523 | PHGDH                |
| -0.962521211 | 2.00E-05    | 0.000388806 | CCT5                 |
| -0.956803262 | 1.00E-05    | 0.000291604 | TCP1                 |
| -0.92198649  | 0.000199998 | 0.002299977 | FAM3C                |
| -0.856788698 | 2.00E-05    | 0.000429733 | CCT6A, CCT6B         |
| -0.837294153 | 1.00E-05    | 0.000709993 | STMN1, STMN2         |
| -0.822111093 | 1.00E-05    | 0.000340205 | CCT8                 |
| -0.817685005 | 9.00E-05    | 0.001289198 | TFRC                 |
| -0.812807356 | 0.001939981 | 0.011776908 | TXNDC12              |
| -0.789088543 | 1.00E-05    | 0.00068041  | CCT3                 |
| -0.782825754 | 0.002199978 | 0.012876574 | MPDU1                |
| -0.775066717 | 0.002249978 | 0.013029125 | CAPRIN1              |
| -0.734052017 | 0.000139999 | 0.001800139 | ANXA1                |
| -0.718900767 | 1.00E-05    | 0.000408246 | CROCC, RDX, EZR, MSN |
| -0.703742435 | 1.00E-05    | 0.000510307 | CCT7                 |
| -0.68926798  | 0.000549995 | 0.004907874 | EIF3I                |
| -0.67557425  | 1.00E-04    | 0.001383884 | HIST1H1              |
| -0.674060605 | 9.00E-05    | 0.001300606 | VARS                 |
| -0.665772802 | 0.003519965 | 0.016565137 | PYCR2                |
| -0.658645917 | 0.004669953 | 0.019553933 | CKAP4                |
| -0.646607536 | 2.00E-05    | 0.000403206 | FLNB, FLNA           |
| -0.603690884 | 1.00E-05    | 0.000251228 | ATP1A                |
| -0.602104541 | 0.003929961 | 0.017582537 | ADRM1                |
| -0.602033807 | 2.00E-05    | 0.000447393 | SLC3A2               |
| -0.596596479 | 0.004369956 | 0.018828862 | TUBB                 |
| -0.555235714 | 0.005099949 | 0.020614398 | ANXA2                |
| -0.533891415 | 0.000569994 | 0.005004305 | MAGEB2               |
| -0.524520394 | 1.00E-05    | 0.000255154 | TUBA                 |
| -0.520172565 | 0.002439976 | 0.013787129 | EIF3                 |
| -0.514446208 | 3.00E-05    | 0.000569615 | CCT3                 |

**Supplementary Table 2.** List of twenty-seven proteins represented for at least two peptides that underwent significant upregulation in the SILAC analyses upon *DERL3* transfection in HCT-116 cells.

| Fold-change        | pvalue          | FDR                | IDsGene             |
|--------------------|-----------------|--------------------|---------------------|
| <b>6.958586926</b> | <b>1.00E-05</b> | <b>0.000267702</b> | <b>DERL3</b>        |
| 3.857562434        | 1.00E-05        | 0.000907213        | AHSG                |
| 2.432704206        | 3.00E-05        | 0.000550444        | HSPH1               |
| 1.451480935        | 1.00E-05        | 0.000259204        | PDIA3, PDIA3P       |
| 1.402771448        | 0.000209998     | 0.002301521        | HRSP12              |
| 1.111380358        | 1.00E-05        | 0.000816492        | ETFB                |
| 1.079300657        | 0.000809992     | 0.006646818        | PTRH2               |
| 0.994102297        | 2.00E-05        | 0.000384231        | SLC25A10;;MRPL12    |
| 0.978930383        | 1.00E-05        | 0.000286488        | DECR1               |
| 0.960342402        | 0.001069989     | 0.007906301        | BAX                 |
| 0.872334856        | 0.000299997     | 0.003024044        | AK2                 |
| 0.852715115        | 0.000189998     | 0.002232136        | TIMM50              |
| 0.851650165        | 1.00E-05        | 0.000388806        | MDH2                |
| 0.794551603        | 1.00E-05        | 0.00204123         | HSPE1               |
| 0.764874225        | 0.002129979     | 0.012602374        | TOMM40              |
| 0.753399553        | 1.00E-05        | 0.001256141        | FABP5               |
| 0.720246609        | 0.002919971     | 0.015283052        | NOMO3, NOMO1, NOMO2 |
| 0.693801557        | 0.00297997      | 0.015448544        | CLPTM1              |
| 0.691584012        | 1.00E-05        | 0.001632984        | HSD17B10            |
| 0.673794805        | 0.003159968     | 0.015926631        | SNRPA1              |
| 0.659222083        | 8.00E-05        | 0.001176925        | TOMM22              |
| 0.652673233        | 7.00E-05        | 0.001039171        | ATP5F1              |
| 0.599973901        | 0.004149959     | 0.018071686        | PRKACA              |
| 0.552247262        | 0.001589984     | 0.010303349        | ATP5H               |
| 0.549975585        | 0.001399986     | 0.009447013        | CYCS                |
| 0.529525741        | 0.009739903     | 0.030295735        | ATP6V1B1, ATP6V1B2  |
| 0.512936823        | 0.000259997     | 0.002704304        | GSR                 |

**Supplementary Table 3.** Frequency of *DERL3* Promoter CpG Island Hypermethylation in Cancer Cell Lines and Primary Tumors.

| Sample Type            | Cancer Cell Lines | Primary Tumors Current Study | Primary Tumors TCGA |
|------------------------|-------------------|------------------------------|---------------------|
| Colorectal             | 4/24 (14.3%)      | 36/128 (28.1%)               | 69/250 (27.6%)      |
| Acute Myeloid Leukemia | 0/11 (0%)         | 0/73 (0%)                    | 0/194 (0%)          |
| Breast                 | 16/30 (53.3%)     | 29/68 (42.6%)                | 284/588 (48.3%)     |
| Bladder                | 1/15 (6.7%)       | 0/26 (0%)                    | 8/167 (4.8%)        |
| Endometrium            | 4/10 (40%)        | 4/43 (9.3%)                  | 38/363 (10.5%)      |
| Esophagus              | 19/28 (67.9%)     | 6/15 (40%)                   | 12/47 (25.5%)       |
| Glioma                 | 6/34 (17.6%)      | 8/44 (18.2%)                 | 6/113 (5.3%)        |
| Head and Neck          | 20/23 (87%)       | 4/13 (30.8%)                 | 7/28 (25%)          |
| Hepatocellular         | 5/8 (62.5%)       | 131/206 (63.6%)              | 42/105 (40%)        |
| Kidney                 | 0/23 (0%)         | 3/53 (5.7%)                  | 35/459 (7.6%)       |
| Melanoma               | 3/34 (8.8%)       | 2/88 (2.3%)                  | 33/314 (10.5%)      |
| Non-Small Cell Lung    | 10/88 (11.4%)     | 35/504 (6.9%)                | 66/651 (10.1%)      |
| Pancreas               | 5/25 (20%)        | 1/14 (7.1%)                  | 2/65 (3.1%)         |
| Prostate               | 1/5 (20%)         | 10/25 (40%)                  | 60/168 (35.7%)      |
| Thyroid                | 1/12 (8.3%)       | 0/14 (0%)                    | 1/56 (1.8%)         |

TCGA, The Cancer Genome Atlas.

---

**Supplementary Table 4.** Frequency of *DERL3* Promoter CpG Island Hypermethylation in Normal Tissues (n=102)

---

| Normal Sample Type     | <i>DERL3</i> Hypermethylation |      |
|------------------------|-------------------------------|------|
| Colorectal mucosa      | 0/17                          | (0%) |
| Acute Myeloid Leukemia | 0/15                          | (0%) |
| Bladder                | 0/5                           | (0%) |
| Glioma                 | 0/9                           | (0%) |
| Hepatocellular         | 0/7                           | (0%) |
| Kidney                 | 0/6                           | (0%) |
| Melanoma               | 0/17                          | (0%) |
| Non-Small Cell Lung    | 0/25                          | (0%) |
| Thyroid                | 0/1                           | (0%) |

---



**Supplementary Table 5.** List of primers.

---

Primers for Bisulfite Genomic Sequencing

|              |    |                              |
|--------------|----|------------------------------|
| <i>DERL3</i> | Fr | TTGGTTGTYGGTTTAGG            |
|              | Rv | ACCAAAAACCAATCAAAAACCT       |
| <i>DERL1</i> | Fr | GTATTAATAATTTTGAGAATTAGGTGAA |
|              | Rv | AACCAACRAAACACCTTCTA         |
| <i>DERL2</i> | Fr | ATGTGYGTTTTTTAGGTTTTTA       |
|              | Rv | AATTCCTAAAAACCCAATCAT        |

Primers for Methylation-Specific PCR

|              |                 |                      |
|--------------|-----------------|----------------------|
| <i>DERL3</i> | Fr Unmethylated | GAGTTTTTGTAGGTGTTGGT |
|              | Rv Unmethylated | CCATAACCATAACAACCCT  |
|              | Fr Methylated   | GAGTTTTTGTAGGTGTCGGC |
|              | Rv Methylated   | CCGTAACCATAACGACCCT  |

Primers for qRT-PCR

|               |    |                            |
|---------------|----|----------------------------|
| <i>DERL3</i>  | Fr | CCTCGTGGACCTGCTGG          |
|               | Rv | GGTCTGCAGGAGCCTCTTG        |
| <i>B2M</i>    | Fr | CCTGAATTGCTATGTGTCTGG      |
|               | Rv | CTCCATGATGCTGCTTACATGTCTCG |
| <i>SLC2A1</i> | Fr | CATCAACGCTGTCTTCTATTACTC   |
|               | Rv | ATGCTCAGATAGGACATCCA       |

Primers for *DERL3* cloning

|                              |    |                                                                     |
|------------------------------|----|---------------------------------------------------------------------|
| <i>DERL3</i> -XhoI           | Fr | CTCGAGCGCCACCATGGCGTGGCAGGGACTAGCGGCCGAGTTCCTGCAGGTGCCGGCGGTGACGC   |
| <i>DERL3</i> -FLAG-GSG-BamHI | Rv | GGATCCTCACTTATCGTCGTATCCTTGTAAATCGCCGAGCCCTGCTGCGGGGTGGCAGATGGGGTCC |
|                              |    | TGGCTGTTCCCTCAGGGAGGGGCAGGTAATTGGG                                  |

---

Fr: Forward primer

Rv: Reverse primer
